# Supplementary material
Source: publisher figshare collection journal article supplement (https://sage.figshare.com/ndownloader/files/22660157)
Supplement: Supplementary file 1 [file 22660157]

## Appendix

### Appendix A – Case Studies:

- **Case 1** - A 29 year old female suffering from an aggressive malignant brain tumour wishes to end her life via accompanied suicide. In recent weeks she has been experiencing increasingly frequent and longer seizures, severe head and neck pain, and stroke-like symptoms. She is afraid of her brain tumour changing her behaviour and causing her pain during the last few months of her life so she has therefore requested accompanied suicide from her doctor. She has full mental capacity and she would also be able to self-administer the lethal medication.
- **Case 2** - A 67 year old male suffering from the effects of Motor Neurone Disease (MND) wishes to end his life via accompanied suicide. He fears becoming entombed in his own body and experiencing a traumatic, drawn-out death so he has therefore requested accompanied suicide from his doctor. He currently has full mental capacity to make this decision, however due to his condition, he may not be able to self-administer the lethal medication.
- **Case 3** - A 60 year old male with terminal liver cancer wishes to end his life via accompanied suicide. He has recently lost the use of his legs and is only able to crawl. He has also become very breathless, therefore he has requested accompanied suicide from his doctor. His mental capacity is declining and he is becoming increasingly confused, however he requested this decision when he had full mental capacity. He would be able to self-administer the lethal medication.
- **Case 4** - A 14 year old female in the end stages of cystic fibrosis (CF) wishes to end her life via accompanied suicide. She is tired of living with the terminal disease which causes recurrent infections and tissue damage. Her breathing has become increasingly difficult, therefore she has requested accompanied suicide from her doctor. She has full mental capacity for a child her age and is able to self-administer the lethal medication.

### Appendix B - Demographics

Demographics Table:

|        |                   | Count<br>(n = 111) | Percentage (%) |
|--------|-------------------|--------------------|----------------|
| Gender | Female            | 58                 | 52.3           |
|        | Male              | 24                 | 21.6           |
|        | Prefer Not to Say | 4                  | 3.6            |
|        | Other             | 0                  | 0.0            |
|        | Unspecified       | 25                 | 22.5           |
|        | <b>Total</b>      | <b>111</b>         | <b>100.0</b>   |
| Age    | 18-24             | 68                 | 61.3           |
|        | 25-34             | 13                 | 11.7           |
|        | 35-44             | 4                  | 3.6            |
|        | 45-54             | 1                  | 0.9            |
|        | 55-64             | 0                  | 0.0            |

|             |                          |            |              |
|-------------|--------------------------|------------|--------------|
|             | 65+                      | 0          | 0.0          |
|             | Unspecified              | 25         | 22.5         |
|             | <b>Total</b>             | <b>111</b> | <b>100.0</b> |
| Ethnicity   | White                    | 10         | 9.0          |
|             | Black                    | 17         | 15.3         |
|             | Mixed                    | 3          | 2.7          |
|             | Arab                     | 15         | 13.5         |
|             | Asian                    | 34         | 30.6         |
|             | Prefer Not to Say        | 4          | 3.6          |
|             | Other                    | 3          | 2.7          |
|             | Unspecified              | 25         | 22.5         |
|             | <b>Total</b>             | <b>111</b> | <b>100.0</b> |
| Postal Code | East                     | 0          | 0.0          |
|             | East Midlands            | 1          | 0.9          |
|             | London                   | 59         | 53.2         |
|             | North East               | 2          | 1.8          |
|             | North West               | 5          | 4.5          |
|             | Northern Ireland         | 0          | 0.0          |
|             | Scotland                 | 0          | 0.0          |
|             | South East               | 8          | 7.2          |
|             | South West               | 5          | 4.5          |
|             | West                     | 0          | 0.0          |
|             | West Midlands            | 2          | 1.8          |
|             | Yorkshire and The Humber | 1          | 0.9          |
|             | International            | 3          | 2.7          |
|             | Unspecified              | 25         | 22.5         |
|             | <b>Total</b>             | <b>111</b> | <b>100.0</b> |
| Religion    | Christian                | 11         | 9.9          |
|             | Catholic                 | 3          | 2.7          |
|             | Orthodox                 | 2          | 1.8          |
|             | Jewish                   | 1          | 0.9          |

|                 |                       |            |              |
|-----------------|-----------------------|------------|--------------|
|                 | Muslim                | 46         | 41.4         |
|                 | Buddhist              | 2          | 1.8          |
|                 | Hindu                 | 6          | 5.4          |
|                 | Sikh                  | 3          | 2.7          |
|                 | Atheist/Agnostic      | 3          | 2.7          |
|                 | Nothing in Particular | 4          | 3.6          |
|                 | Prefer Not to Say     | 3          | 2.7          |
|                 | Other                 | 2          | 1.8          |
|                 | Unspecified           | 25         | 22.5         |
|                 | <b>Total</b>          | <b>111</b> | <b>100.0</b> |
| Past Experience | Yes                   | 20         | 18.0         |
|                 | No                    | 39         | 35.1         |
|                 | Unspecified/Skipped   | 52         | 46.8         |
|                 | <b>Total</b>          | <b>111</b> | <b>100.0</b> |

Table 1 demographics of the participants

Religion Pie Charts:

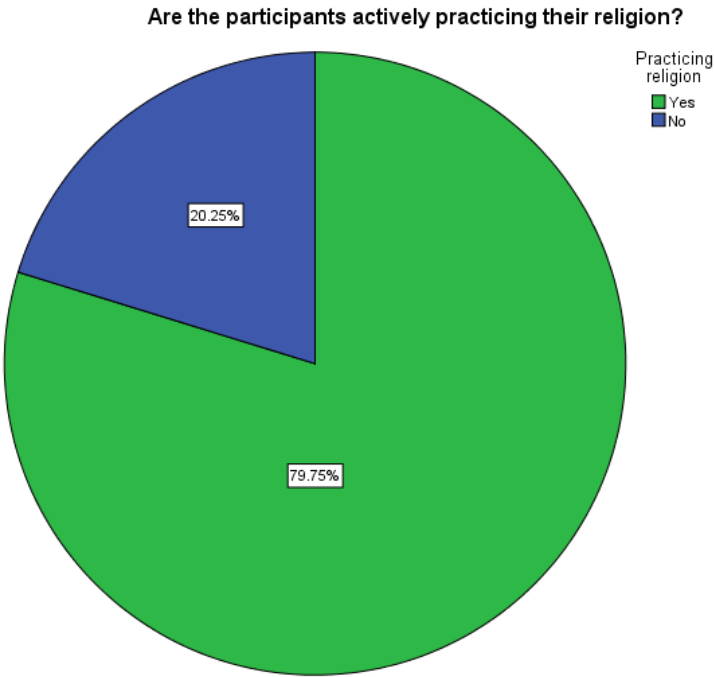

Figure 1 are participants actively practicing their religion?

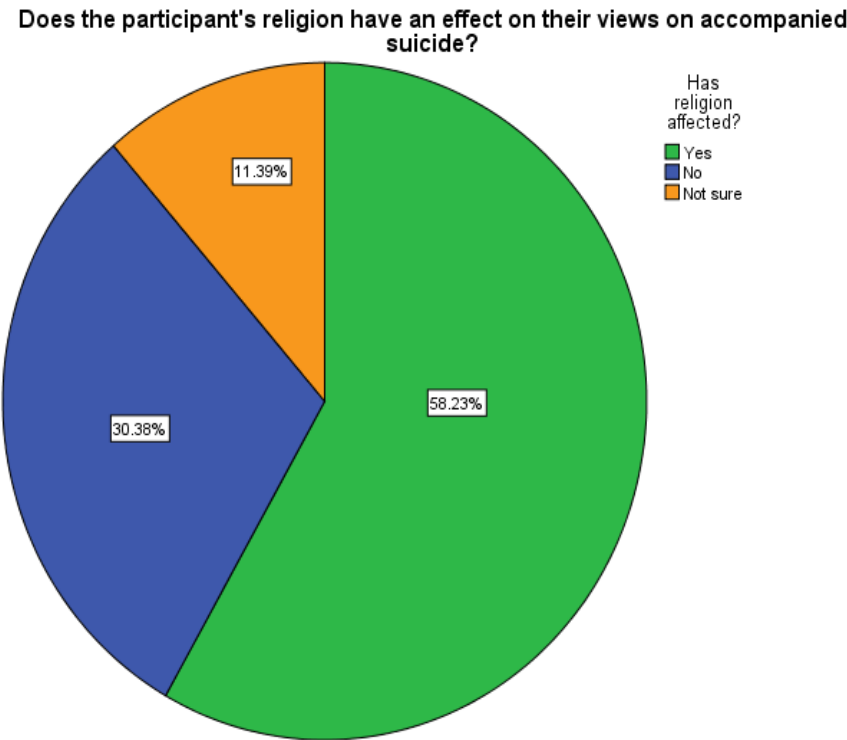

Figure 2 do participants believe their religion influenced their opinions of accompanied suicide?

**Appendix C – Frequency Tables:**

**Section A:**

*Law:*

**Is it legal in the UK?**

|                      |     | Count (n = 111) | Percent (%) |
|----------------------|-----|-----------------|-------------|
| Voluntary Euthanasia | Yes | 5               | 4.5%        |
|                      | No  | 106             | 95.5%       |
| Assisted Dying       | Yes | 12              | 10.8%       |
|                      | No  | 99              | 89.2%       |
| Accompanied Suicide  | Yes | 5               | 4.5%        |
|                      | No  | 106             | 95.5%       |

*Table 2 the laws on accompanied suicide and associated terms in the UK*

**Section B:**

*Opinions:*

**Opinions on Accompanied Suicide with each Case Study**

|              |                            | Count (n = 111) | Percent (%) |
|--------------|----------------------------|-----------------|-------------|
| Case Study 1 | Agree                      | 30              | 27.0        |
|              | Neither Agree nor Disagree | 15              | 13.5        |
|              | Disagree                   | 52              | 46.8        |
|              | Not Sure                   | 2               | 1.8         |
|              | Unspecified                | 12              | 10.8        |
|              | Total                      | 111             | 100.0       |
| Case Study 2 | Agree                      | 32              | 28.8        |
|              | Neither Agree nor Disagree | 18              | 16.2        |
|              | Disagree                   | 44              | 39.6        |
|              | Not Sure                   | 2               | 1.8         |
|              | Unspecified                | 15              | 13.5        |
|              | Total                      | 111             | 100.0       |
| Case Study 3 | Agree                      | 25              | 22.5        |
|              | Neither Agree nor Disagree | 16              | 14.4        |

|              |                            |     |       |
|--------------|----------------------------|-----|-------|
|              | Disagree                   | 43  | 38.7  |
|              | Not Sure                   | 4   | 3.6   |
|              | Unspecified                | 23  | 20.7  |
|              | Total                      | 111 | 100.0 |
| Case Study 4 | Agree                      | 16  | 14.4  |
|              | Neither Agree nor Disagree | 9   | 8.1   |
|              | Disagree                   | 57  | 51.4  |
|              | Not Sure                   | 4   | 3.6   |
|              | Unspecified                | 25  | 22.5  |
|              | Total                      | 111 | 100.0 |

Table 3 participant’s opinions on each case study

Descriptive Statistics

|                          | N  | Range | Minimum | Maximum | Mean | Std. Deviation | Variance |
|--------------------------|----|-------|---------|---------|------|----------------|----------|
| Opinions on Case Study 1 | 99 | 3     | 1       | 4       | 2.26 | .921           | .849     |
| Opinions on Case Study 2 | 96 | 3     | 1       | 4       | 2.17 | .925           | .856     |
| Opinions on Case Study 3 | 88 | 3     | 1       | 4       | 2.30 | .937           | .877     |
| Opinions on Case Study 4 | 86 | 3     | 1       | 4       | 2.57 | .848           | .719     |

Table 4 descriptive statistics of participant’s opinions on each case study, where 1 = agree, 2 = neither agree nor disagree, 3 = disagree and 4 = not sure

#### Appendix D – Cross-Tabulation/Chi-Square Tests:

(N.B. Results shown below grouped together ‘strongly agree’ with ‘agree’ responses and ‘strongly disagree’ with ‘disagree’ responses. Results shown not including ‘unspecified’, ‘neither agree nor disagree’, and ‘not sure’ responses. Results highlighted in yellow are statistically significant but may not be valid, results highlighted in green are statistically significant and valid.)

#### Participant Factors:

##### Case 1:

Table 5 Pearson Chi-Square tests for Case Study 1. Tests include the link between participant’s opinions on the case study vs their demographics, such as gender, age, ethnicity and post code.

#### Pearson Chi-Square Tests (Case Study 1)

|                          |            | Gender | Age  | Ethnicity | Post Code |
|--------------------------|------------|--------|------|-----------|-----------|
| Opinions on Case Study 1 | Chi-square | 3.630  | .256 | .032      | .436      |
|                          | df         | 1      | 1    | 1         | 1         |
|                          | Sig.       | .057   | .613 | .859      | .509      |

Results are based on nonempty rows and columns in each innermost subtable.

Table 6 Pearson Chi-Square tests for Case Study 1. Tests include the link between participant’s opinions on the case study vs their religion, whether they practice their religion and whether they believe their religion influenced their opinions.

#### Pearson Chi-Square Tests (Case Study 1)

|                          |            | Religion          | Practicing Religion | Religion influenced<br>Opinions? |
|--------------------------|------------|-------------------|---------------------|----------------------------------|
| Opinions on Case Study 1 | Chi-square | 9.130             | 17.904              | 31.937                           |
|                          | df         | 1                 | 1                   | 1                                |
|                          | Sig.       | .003 <sup>a</sup> | .000 <sup>a</sup>   | .000                             |

Results are based on nonempty rows and columns in each innermost subtable.

\*. The Chi-square statistic is significant at the .05 level.

## Pearson Chi-Square Tests (Case Study 1)

|                          |            | Experience with Terminal Illness? |
|--------------------------|------------|-----------------------------------|
| Opinions on Case Study 1 | Chi-square | 1.514                             |
|                          | df         | 2                                 |
|                          | Sig.       | .469                              |

Results are based on nonempty rows and columns in each innermost subtable.

*Table 7 Pearson Chi-Square tests for Case Study 1. Tests include the link between participant's opinions on the case study vs their experience with terminal illness.*

Case 2:

## Pearson Chi-Square Tests (Case Study 2)

|                          |            | Gender | Age  | Ethnicity | Post Code |
|--------------------------|------------|--------|------|-----------|-----------|
| Opinions on Case Study 2 | Chi-square | 3.245  | .084 | .454      | 1.457     |
|                          | df         | 1      | 1    | 1         | 1         |
|                          | Sig.       | .072   | .772 | .501      | .227      |

Results are based on nonempty rows and columns in each innermost subtable.

*Table 8 Pearson Chi-Square tests for Case Study 2. Tests include the link between participant's opinions on the case study vs their demographics, such as gender, age, ethnicity and post code.*

## Pearson Chi-Square Tests (Case Study 2)

|                          |            | Religion            | Practicing Religion | Religion influenced Opinions? |
|--------------------------|------------|---------------------|---------------------|-------------------------------|
| Opinions on Case Study 2 | Chi-square | 11.148              | 21.678              | 28.215                        |
|                          | df         | 1                   | 1                   | 1                             |
|                          | Sig.       | .001 <sup>a,b</sup> | .000 <sup>a,b</sup> | .000 <sup>a</sup>             |

Results are based on nonempty rows and columns in each innermost subtable.

\*. The Chi-square statistic is significant at the .05 level.

b. More than 20% of cells in this subtable have expected cell counts less than 5. Chi-square results may be invalid.

*Table 9 Pearson Chi-Square tests for Case Study 2. Tests include the link between participant's opinions on the case study vs their religion, whether they practice their religion and whether they believe their religion influenced their opinions.*



### Pearson Chi-Square Tests (Case Study 2)

|                          |            | Experience with Terminal Illness |
|--------------------------|------------|----------------------------------|
| Opinions on Case Study 2 | Chi-square | 1.963                            |
|                          | df         | 2                                |
|                          | Sig.       | .375                             |

Table 10 Pearson Chi-Square tests for Case Study 2. Tests include the link between participant's opinions on the case study vs their experience with terminal illness.

Case 3:

### Pearson Chi-Square Tests (Case Study 3)

|                          |            | Gender | Age  | Ethnicity | Post Code |
|--------------------------|------------|--------|------|-----------|-----------|
| Opinions on Case Study 3 | Chi-square | 2.520  | .187 | .591      | .001      |
|                          | df         | 1      | 1    | 1         | 1         |
|                          | Sig.       | .112   | .665 | .442      | .980      |

Results are based on nonempty rows and columns in each innermost subtable.

Table 11 Pearson Chi-Square tests for Case Study 3. Tests include the link between participant's opinions on the case study vs their demographics, such as gender, age, ethnicity and post code.

### Pearson Chi-Square Tests (Case Study 3)

|                          |            | Religion            | Practicing Religion | Religion influenced Opinions? |
|--------------------------|------------|---------------------|---------------------|-------------------------------|
| Opinions on Case Study 3 | Chi-square | 9.668               | 20.138              | 16.689                        |
|                          | df         | 1                   | 1                   | 1                             |
|                          | Sig.       | .002 <sup>*,b</sup> | .000 <sup>*,b</sup> | .000 <sup>*,b</sup>           |

Results are based on nonempty rows and columns in each innermost subtable.

\*. The Chi-square statistic is significant at the .05 level.

b. More than 20% of cells in this subtable have expected cell counts less than 5. Chi-square results may be invalid.

Table 12 Pearson Chi-Square tests for Case Study 3. Tests include the link between participant's opinions on the case study vs their religion, whether they practice their religion and whether they believe their religion influenced their opinions.

### Pearson Chi-Square Tests (Case Study 3)

|                          |            | Experience with Terminal Illness? |
|--------------------------|------------|-----------------------------------|
| Opinions on Case Study 3 | Chi-square | 5.226                             |
|                          | df         | 2                                 |
|                          | Sig.       | .073                              |

Results are based on nonempty rows and columns in each innermost subtable.

Table 13 Pearson Chi-Square tests for Case Study 3. Tests include the link between participant's opinions on the case study vs their experience with terminal illness.

### Case 4:

### Pearson Chi-Square Tests (Case Study 4)

|                          |            | Gender            | Age               | Ethnicity | Post Code |
|--------------------------|------------|-------------------|-------------------|-----------|-----------|
| Opinions on Case Study 4 | Chi-square | .101              | .405              | .147      | .005      |
|                          | df         | 1                 | 1                 | 1         | 1         |
|                          | Sig.       | .751 <sup>a</sup> | .524 <sup>a</sup> | .701      | .946      |

Results are based on nonempty rows and columns in each innermost subtable.

a. More than 20% of cells in this subtable have expected cell counts less than 5. Chi-square results may be invalid.

Table 14 Pearson Chi-Square tests for Case Study 4. Tests include the link between participant's opinions on the case study vs their demographics, such as gender, age, ethnicity and post code.

### Pearson Chi-Square Tests (Case Study 4)

|                          |            | Religion            | Practicing Religion | Religion influenced Opinions? |
|--------------------------|------------|---------------------|---------------------|-------------------------------|
| Opinions on Case Study 4 | Chi-square | 15.220              | 11.733              | 12.599                        |
|                          | df         | 1                   | 1                   | 1                             |
|                          | Sig.       | .000 <sup>*,b</sup> | .001 <sup>*,b</sup> | .000 <sup>*,b</sup>           |

Results are based on nonempty rows and columns in each innermost subtable.

\*. The Chi-square statistic is significant at the .05 level.

b. More than 20% of cells in this subtable have expected cell counts less than 5. Chi-square results may be invalid.

Table 15 Pearson Chi-Square tests for Case Study 4. Tests include the link between participant's opinions on the case study vs their religion, whether they practice their religion and whether they believe their religion influenced their opinions.

### Pearson Chi-Square Tests (Case Study 4)

| Experience with Terminal Illness |            |                   |
|----------------------------------|------------|-------------------|
| Opinions on Case Study 4         | Chi-square | 5.570             |
|                                  | df         | 2                 |
|                                  | Sig.       | .062 <sup>a</sup> |

Results are based on nonempty rows and columns in each innermost subtable.

a. More than 20% of cells in this subtable have expected cell counts less than 5. Chi-square results may be invalid.

*Table 16 Pearson Chi-Square tests for Case Study 4. Tests include the link between participant's opinions on the case study vs their experience with terminal illness.*

### Pearson Chi-Square Tests

|                                                                                      |            | Opinions on Dispensing CS1 | Opinions on Dispensing CS2 | Opinions on Dispensing CS3 | Opinions on Dispensing CS4 |
|--------------------------------------------------------------------------------------|------------|----------------------------|----------------------------|----------------------------|----------------------------|
| Believe they have been taught aspects of accompanied suicide on their MPharm course? | Chi-square | .038                       | .091                       | 1.149                      | .108                       |
|                                                                                      | df         | 1                          | 1                          | 1                          | 1                          |
|                                                                                      | Sig.       | .845                       | .763                       | .284                       | .743 <sup>a</sup>          |

Results are based on nonempty rows and columns in each innermost subtable.

a. More than 20% of cells in this subtable have expected cell counts less than 5. Chi-square results may be invalid.

*Table 17 Pearson Chi-Square tests against participants' opinions on dispensing lethal medication for accompanied suicide vs whether they believe they have been taught aspects of accompanied suicide during their MPharm course.*
